# Supplementary material for: Global Emissions Inventory from Open Biomass Burning (GEIOBB): utilizing Fengyun-3D global fire spot monitoring data
Source: Copernicus journal article supplement (doi:10.5194/essd-16-3495-2024), 2024-08-02
Supplement: Supplementary file 1 [file essd-16-3495-2024-supplement.pdf]

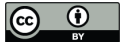

*Supplement of*

**Global Emissions Inventory from Open Biomass Burning (GEIOBB):  
utilizing Fengyun-3D global fire spot monitoring data**

**Yang Liu et al.**

*Correspondence to:* Yusheng Shi (shiys@aircas.ac.cn) and Tianchan Shan (shantc9165@163.com)

The copyright of individual parts of the supplement might differ from the article licence.

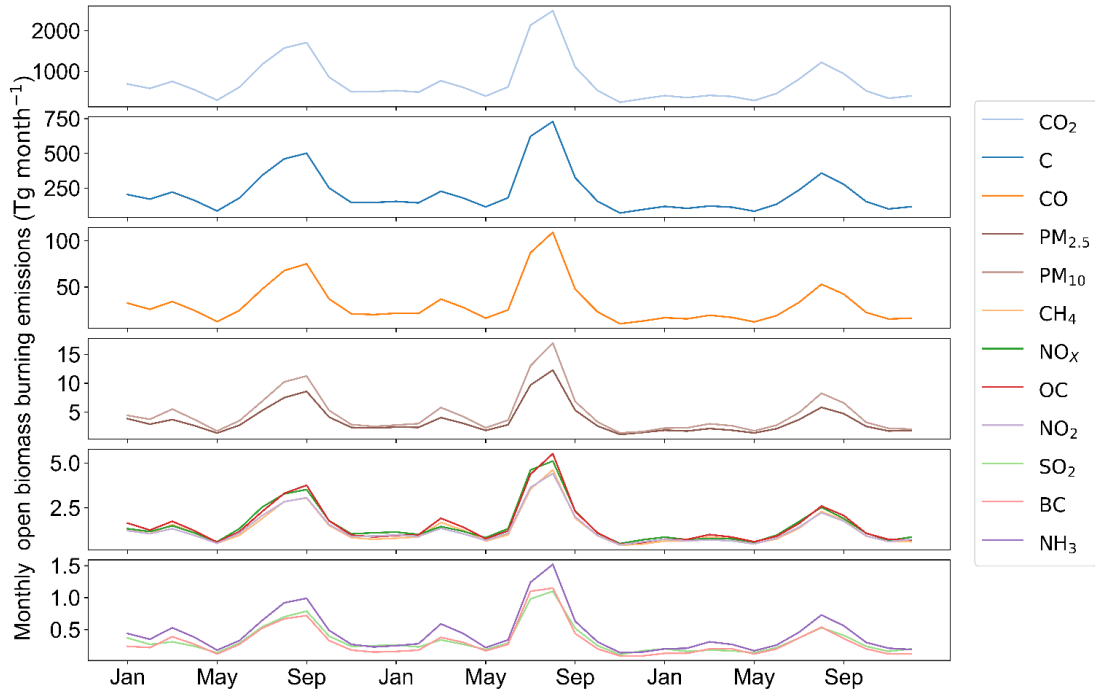

**Figure S1: Global monthly variations of OBB emissions from 2020 to 2022.**

Small fire counts Comparison of MODIS and FY-3D

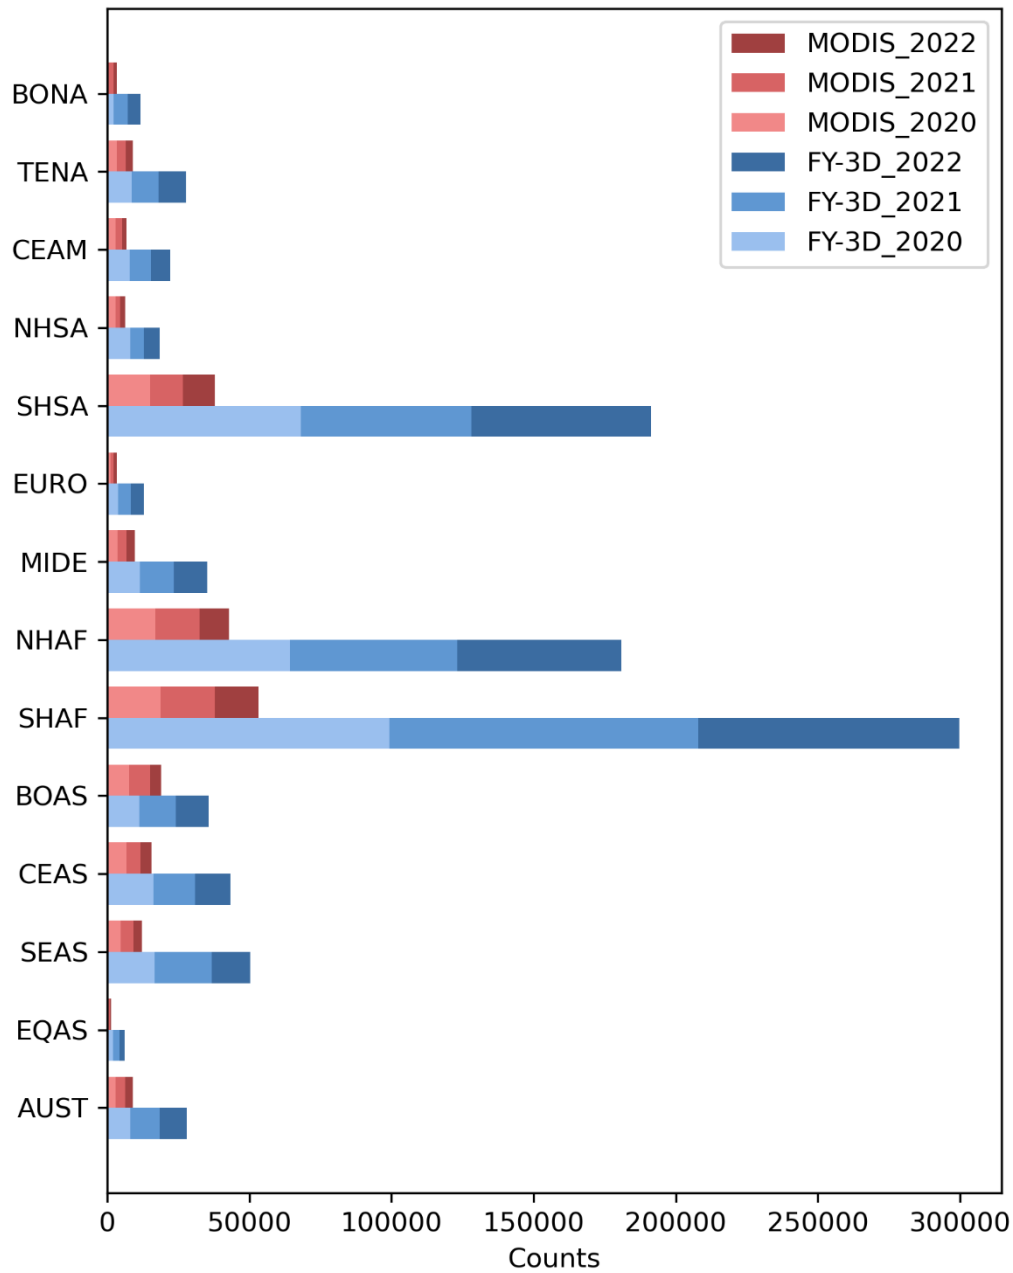

Figure S2. Small fire count in 2020-2022 between MODIS active fire and FY-3D GFR

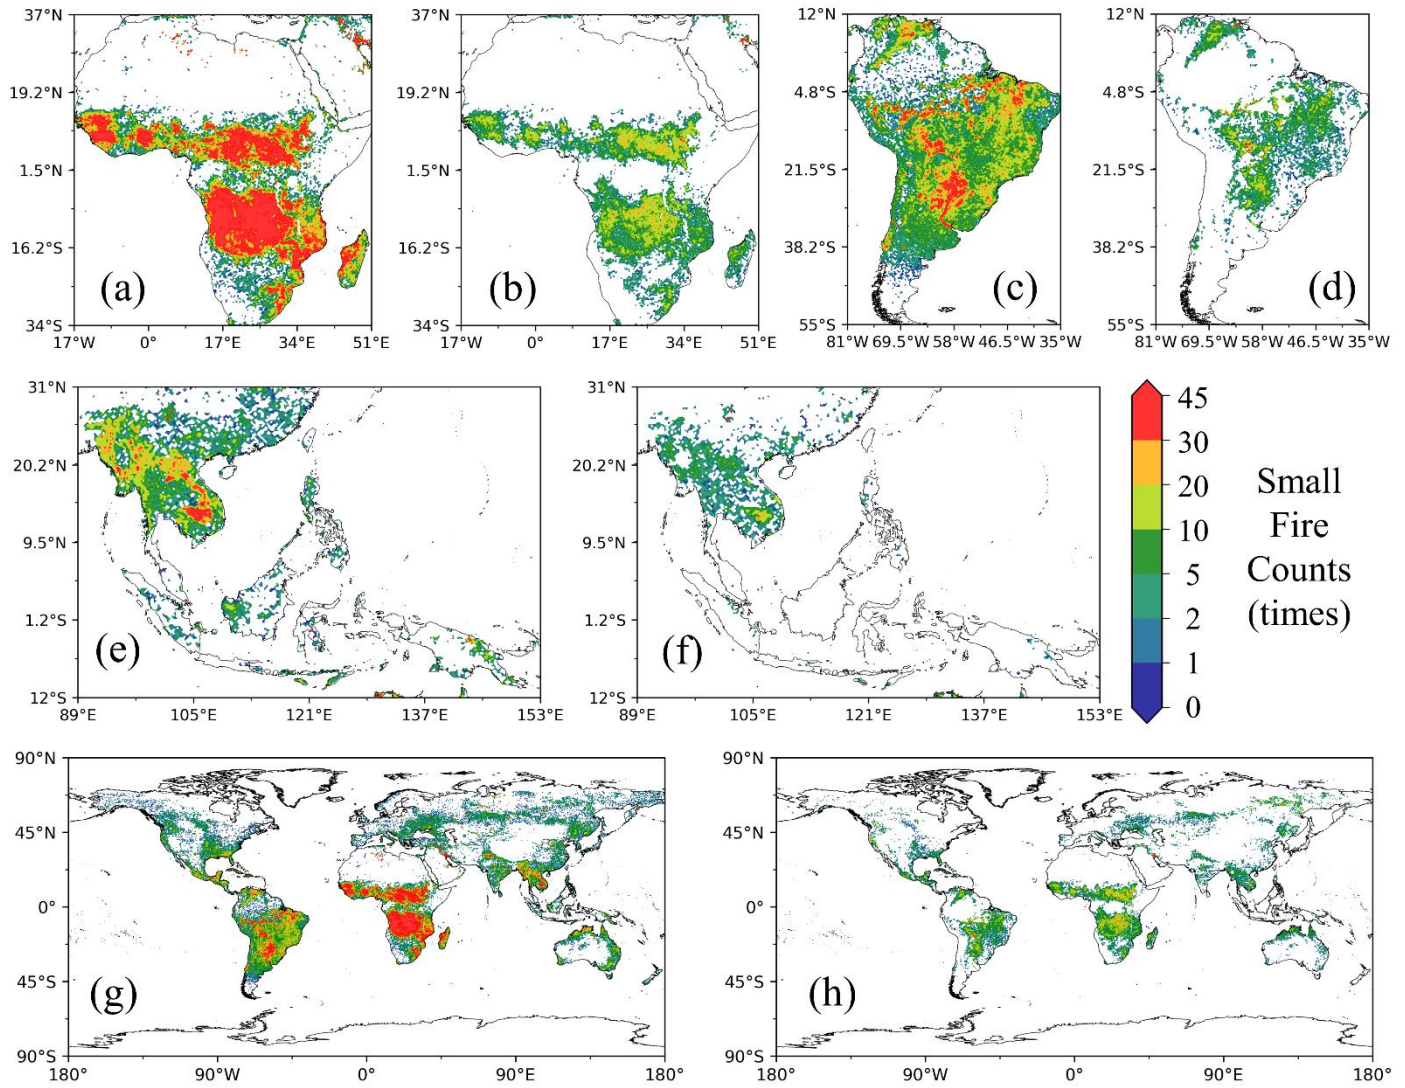

**Figure S3. Small fire counts in 2020-2022. (a) FY-3D GFR in Africa. (b) MODIS GFR in Africa. (c) FY-3D GFR in South America. (d) MODIS active fire in South America. (e) FY-3D GFR in Southeast Asia. (f) MODIS active fire in Southeast Asia. (g) FY-3D GFR in Global. (h) MODIS active fire in Global.**

**Table S1. Comparison of parameters related to MERSI-2, MODIS, and VIIRS.**

|                                      | <b>MERSI-2<br/>(FY-3D)</b> | <b>MODIS<br/>(AQUA)</b>        | <b>VIIRS<br/>(NOAA-20)</b>     |
|--------------------------------------|----------------------------|--------------------------------|--------------------------------|
| Orbit altitude (km)                  | 836                        | 705                            | 824                            |
| Equator Crossing time                | 14:00 LT                   | 13:30 LT                       | 14:20 LT                       |
| Swath (km)                           | 2900                       | 2330                           | 3060                           |
| Pixel resolution at nadir (km)       | 1                          | 1                              | 0.75/0.375                     |
| Pixel resolution at the edge (km)    | >6                         | 4                              | 1.5/0.75                       |
| ID MIR Band (s)                      | 21                         | 21/22                          | M-13/I-4                       |
| Spectral range ( $\mu\text{m}$ )     | 3.973–4.128                | 3.929–3.989<br>3.940–4.001     | 3.973–4.128<br>3.550–3.930     |
| TMAX<br>(SNR–NE $\Delta$ T on orbit) | 380 K (0.25)               | 500 K (0.183)<br>331 K (0.019) | 634 K (0.04)                   |
| ID TIR Band (s)                      | 24                         | 31                             | M-15/I-5                       |
| Spectral range ( $\mu\text{m}$ )     | 10.300–11.300              | 10.780–11.280                  | 10.263–11.263<br>10.500–12.400 |
| TMAX (SNR–NE $\Delta$ T on orbit)    | 330 K (0.4)                | 400 K (0.017)                  | 343 K (0.03)                   |

TMAX means maximum temperature, SNR means signal-to-noise ratio, and NE $\Delta$ T means noise equivalent differential temperature.

**Table S2. Reclassification method.**

| <b>IGBP LCT Description</b>         | <b>LCT Value</b> | <b>Method and Value</b>                                                                                             |
|-------------------------------------|------------------|---------------------------------------------------------------------------------------------------------------------|
| Evergreen Needleleaf Forests        | 1                | If latitude > 50, then V5; else V6                                                                                  |
| Evergreen Broadleaf Forests         | 2                | If latitude > -23.5 and < 23.5, then V3; else V4                                                                    |
| Deciduous Needleleaf Forests        | 3                | If latitude > 50, then V5; else V4                                                                                  |
| Deciduous Broadleaf Forests         | 4                | V4                                                                                                                  |
| Mixed Forests                       | 5                | If latitude > 50, then V5; if latitude > -23.5 and < 23.5, then V3; else V4                                         |
| Closed Shrublands                   | 6                | V2                                                                                                                  |
| Open Shrublands                     | 7                | V2                                                                                                                  |
| Woody Savannas                      | 8                | V2                                                                                                                  |
| Savannas                            | 9                | V1                                                                                                                  |
| Grasslands                          | 10               | V1                                                                                                                  |
| Permanent Wetlands                  | 11               | V1                                                                                                                  |
| Croplands                           | 12               | V7                                                                                                                  |
| Urban and Built-up Lands            | 13               | If tree cover < 40, then V1; if tree cover > 40 and < 60, then V2; if tree cover > 60 then assign to Mixed Forests. |
| Cropland/Natural Vegetation Mosaics | 14               | V1                                                                                                                  |
| Permanent Snow and Ice              | 15               | -                                                                                                                   |
| Barren                              | 16               | V1                                                                                                                  |
| Water Bodies                        | 17               | -                                                                                                                   |

A major influence on fire discharge in the framework is the condition of the subsurface at the location of the fire event. Different types of subsurface have different biological qualities and correlates. In GEIOBB we used IGBP categorized data from MODIS LCT (Friedl and Sulla-Menashe, 2022) and we reclassified the original 17 classifications and reclassified the results to reorganize the subsurface types into seven categories (Table 1, reclassification approach), including grasslands and savannas (V1), woody savannas or shrubs (V2), tropical forests (V3), temperate forests (V4), boreal forests (V5), temperate evergreen forests (V6), and crops (V7), to allow for better matching in subsequent assignments of biomass and related factors.

**Table S3.** Annual global fire CO<sub>2</sub> emission from different regions between GEIOBB and FINN during 2020 to 2021 (Unit: Tg).

|             | <b>1</b> | <b>2</b> | <b>3</b> | <b>4</b> | <b>5</b> | <b>6</b> | <b>7</b> | <b>8</b> | <b>9</b> | <b>10</b> | <b>11</b> | <b>12</b> |
|-------------|----------|----------|----------|----------|----------|----------|----------|----------|----------|-----------|-----------|-----------|
| <b>BONA</b> | 3.85     | 1.40     | 1.96     | 2.25     | 10.21    | 8.46     | 174.01   | 60.47    | 2.01     | 11.99     | 10.55     | 6.64      |
|             | 0.95     | 0.40     | 0.35     | 0.80     | 3.58     | 6.99     | 74.71    | 33.03    | 2.03     | 9.13      | 5.21      | 1.91      |
| <b>TENA</b> | 15.89    | 11.61    | 21.38    | 14.33    | 5.61     | 15.33    | 106.21   | 217.38   | 203.59   | 55.53     | 30.45     | 12.86     |
|             | 5.50     | 7.53     | 22.27    | 16.94    | 5.27     | 5.18     | 25.24    | 78.38    | 99.47    | 22.87     | 18.23     | 6.77      |
| <b>CEAM</b> | 2.40     | 5.20     | 20.66    | 63.71    | 25.69    | 5.75     | 1.40     | 1.69     | 1.51     | 1.49      | 1.31      | 2.82      |
|             | 3.70     | 7.52     | 30.58    | 141.69   | 86.03    | 9.22     | 1.98     | 1.36     | 1.76     | 1.33      | 1.78      | 3.03      |
| <b>NHSA</b> | 12.85    | 36.13    | 52.55    | 18.95    | 4.97     | 1.81     | 3.34     | 3.87     | 5.22     | 5.37      | 7.58      | 3.83      |
|             | 24.35    | 75.47    | 94.84    | 36.39    | 13.55    | 1.70     | 2.27     | 2.87     | 5.80     | 13.36     | 5.95      | 7.18      |
| <b>SHSA</b> | 19.95    | 24.41    | 28.90    | 28.00    | 36.51    | 48.94    | 160.29   | 632.45   | 503.07   | 341.86    | 89.81     | 33.15     |
|             | 19.17    | 14.27    | 20.49    | 21.02    | 29.00    | 53.80    | 139.46   | 630.35   | 658.28   | 437.38    | 131.72    | 41.66     |
| <b>EURO</b> | 1.60     | 2.84     | 4.00     | 4.49     | 2.13     | 1.72     | 4.02     | 14.79    | 3.19     | 1.35      | 0.95      | 0.56      |
|             | 0.54     | 2.44     | 5.60     | 7.03     | 0.84     | 1.08     | 4.26     | 8.65     | 4.24     | 2.41      | 0.83      | 0.22      |
| <b>MIDE</b> | 0.77     | 0.54     | 0.54     | 0.43     | 1.03     | 1.81     | 9.59     | 14.65    | 2.70     | 2.67      | 0.97      | 0.77      |
|             | 0.51     | 0.52     | 0.48     | 0.36     | 1.21     | 2.17     | 2.23     | 2.86     | 1.49     | 1.88      | 1.35      | 0.75      |
| <b>NHAF</b> | 391.64   | 317.22   | 161.86   | 99.89    | 25.47    | 3.34     | 3.63     | 7.48     | 4.16     | 15.37     | 119.84    | 314.86    |
|             | 323.62   | 481.45   | 328.99   | 104.57   | 21.13    | 8.52     | 4.71     | 3.90     | 3.71     | 20.30     | 109.00    | 229.80    |
| <b>SHAF</b> | 13.17    | 18.31    | 18.06    | 10.11    | 128.30   | 444.23   | 894.25   | 782.83   | 582.74   | 198.81    | 62.61     | 14.08     |
|             | 9.79     | 20.37    | 23.25    | 23.03    | 105.28   | 348.06   | 669.50   | 533.22   | 447.17   | 146.53    | 79.21     | 19.38     |
| <b>BOAS</b> | 0.55     | 0.71     | 7.88     | 56.70    | 31.79    | 60.78    | 260.32   | 254.43   | 63.36    | 13.17     | 3.15      | 0.33      |
|             | 0.01     | 0.12     | 9.04     | 82.38    | 39.74    | 73.64    | 244.67   | 198.78   | 41.65    | 11.78     | 2.00      | 0.06      |
| <b>CEAS</b> | 5.89     | 5.16     | 17.84    | 26.60    | 5.09     | 2.76     | 5.56     | 7.22     | 4.85     | 10.96     | 4.76      | 8.83      |
|             | 13.09    | 15.24    | 43.69    | 70.69    | 12.56    | 9.96     | 13.81    | 15.37    | 12.52    | 19.20     | 7.83      | 11.24     |
| <b>SEAS</b> | 27.58    | 80.90    | 411.98   | 228.48   | 30.86    | 3.43     | 1.38     | 1.32     | 0.74     | 2.39      | 5.77      | 5.29      |
|             | 98.13    | 197.47   | 660.16   | 422.14   | 51.68    | 9.12     | 5.61     | 5.16     | 4.97     | 14.36     | 32.36     | 27.96     |
| <b>EQAS</b> | 1.15     | 3.87     | 6.46     | 1.96     | 1.23     | 1.36     | 3.87     | 10.26    | 11.12    | 5.80      | 2.15      | 0.47      |
|             | 3.90     | 7.39     | 10.63    | 8.60     | 6.01     | 8.29     | 18.86    | 21.04    | 29.51    | 22.06     | 9.79      | 2.54      |
| <b>AUST</b> | 111.35   | 26.62    | 6.81     | 19.57    | 32.34    | 16.00    | 22.51    | 22.66    | 19.86    | 27.23     | 28.51     | 8.38      |
|             | 51.09    | 9.21     | 4.19     | 11.68    | 23.70    | 13.99    | 18.87    | 14.02    | 12.07    | 20.42     | 22.73     | 9.16      |

The upper values are from GEIOBB, and the lower values are from FINN.
